# Supplementary material
Source: PubMed Central journal article supplement (PMC3109356)
Supplement: NIHMS281068-supplement-01.pdf [file NIHMS281068-supplement-01.pdf]

**Supplement:**

**Susceptibility and mode of binding of the *Mycobacterium tuberculosis* cysteinyl transferase mycothiol ligase to tRNA synthetase inhibitors**

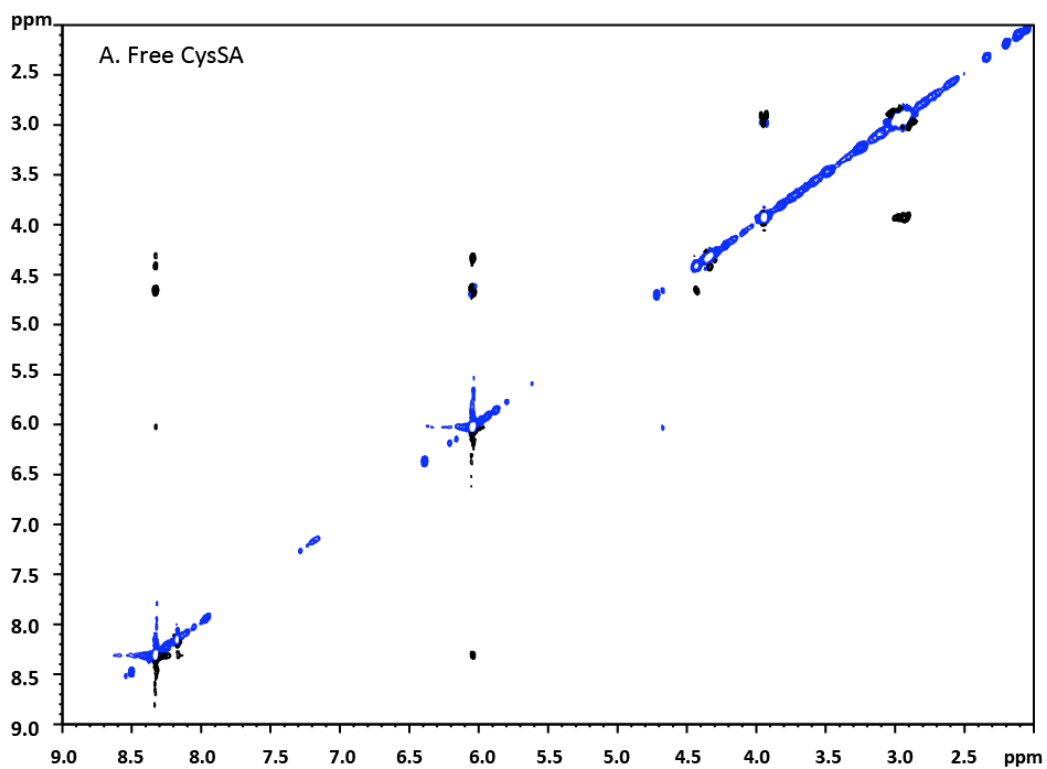

**Figure S1.** NOESY spectrum of free CysSA.

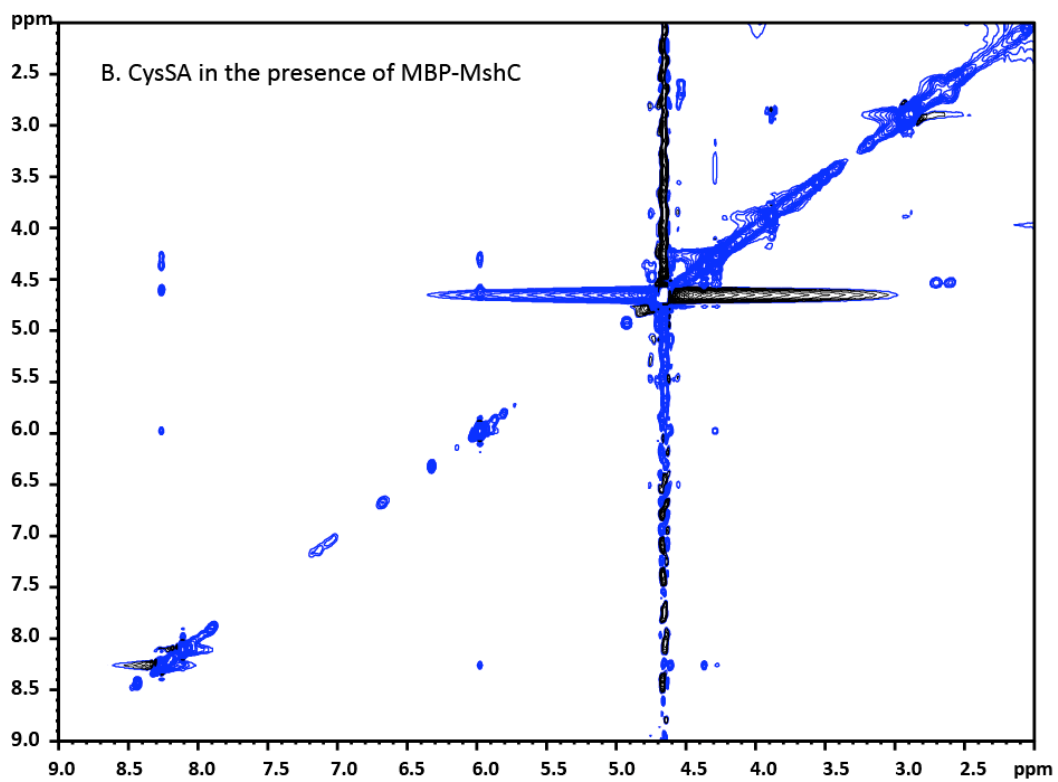

**Figure S2.** NOESY spectrum of CysSA in the presence of MBP-MshC.

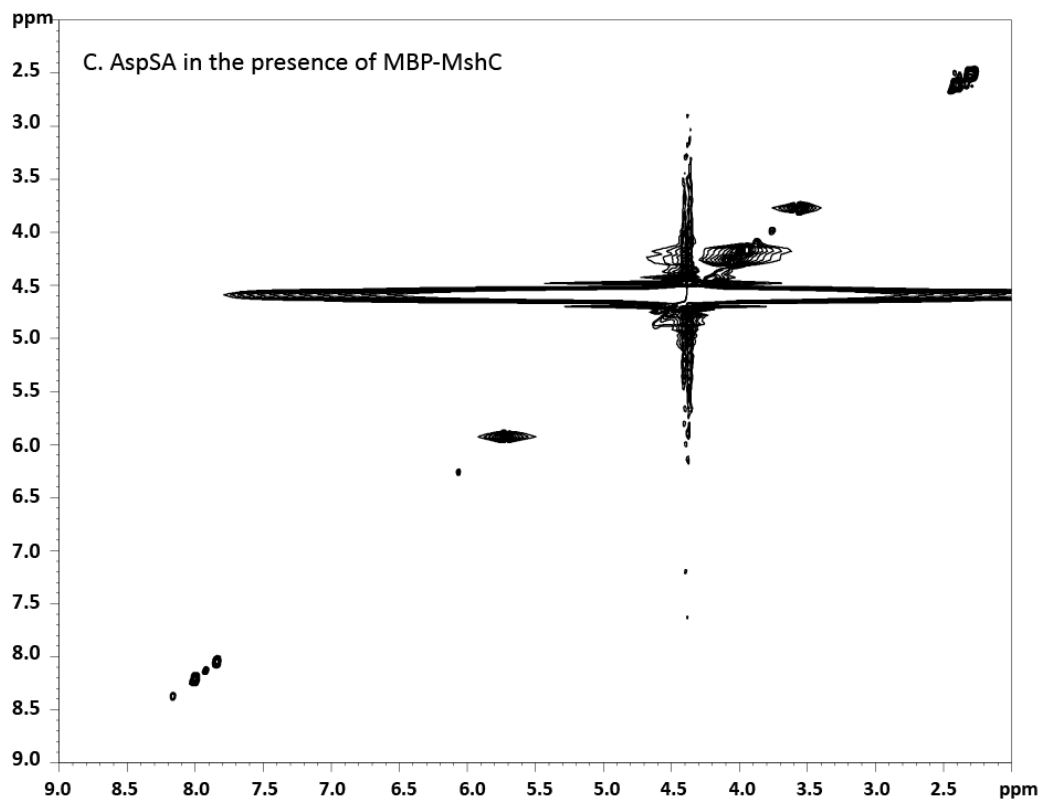

**Figure S2.** NOESY spectrum of AspSA in the presence of MBP-MshC.
